# Supplementary material
Source: publisher figshare collection journal article supplement (https://acs.figshare.com/ndownloader/files/4690537)
Supplement: Supplementary file 1 [file 4690537]

**Table 1.** Mean Squares for Capsaicin (CAP), Dihydrocapsaicin (DHC) and Total Capsaicinoid Contents of Six Families of an Intraspecific Cross of *C. annuum* L. across Two Environments

| source of variation | df <sup>a</sup> | CAP      | DHC       | total capsaicinoids <sup>b</sup> |
|---------------------|-----------------|----------|-----------|----------------------------------|
| Families (F)        | 5               | 20865*** | 11837 *** | 63955***                         |
| Environment (E)     | 1               | 11928**  | 6156*     | 35229 **                         |
| F x E               | 5               | 6884***  | 5462 ***  | 23856 ***                        |
| Error               | 203             | 1361     | 1028      | 4442                             |

<sup>a</sup> df, degrees of freedom.

<sup>b</sup> Total capsaicinoids considered as the sum of the capsaicin and dihydrocapsaicin contents.

\*, \*\*, \*\*\* Significant at  $p < 0.05$ , 0.01, or 0.001, respectively.

**Table 2.** Joint Scaling Test and Estimates ( $\pm$  SE) Obtained using a Three-parameter Model and Individual Scaling Test A, B, and C Models using the Means of Six Families for Capsaicin (CAP), Dihydrocapsaicin (DHC), and Total Capsaicinoids of an Intraspecific Cross of *C. annuum* L. across Two Environments

|                       | CAP                | DHC               | total<br>capsaicinoids <sup>a</sup> |
|-----------------------|--------------------|-------------------|-------------------------------------|
| <b>Spring</b>         |                    |                   |                                     |
| three parameter model |                    |                   |                                     |
| m <sup>b</sup>        | 4.8* $\pm$ 1.8     | 5.1** $\pm$ 2.0   | 10.0* $\pm$ 3.8                     |
| [d] <sup>c</sup>      | 4.8* $\pm$ 1.8     | 5.1** $\pm$ 2.0   | 10.0* $\pm$ 3.8                     |
| [h] <sup>d</sup>      | 38.6** $\pm$ 6.3   | 31.0** $\pm$ 5.7  | 68.2** $\pm$ 11.5                   |
| $\chi^2$              | 4.8                | 6.1               | 5.4                                 |
| p                     | 0.19               | 0.11              | 0.15                                |
| scaling tests         |                    |                   |                                     |
| A                     | -4.2 $\pm$ 13.5    | -1.13 $\pm$ 15.9  | -1.0 $\pm$ 23.9                     |
| B                     | 8.2 $\pm$ 30.3     | 12.8 $\pm$ 15.5   | 16.8 $\pm$ 52.9                     |
| C                     | 70.3* $\pm$ 34.9   | 79.1* $\pm$ 33.5  | 149.9* $\pm$ 66.7                   |
| <b>Summer</b>         |                    |                   |                                     |
| three parameter model |                    |                   |                                     |
| m                     | 4.9** $\pm$ 1.1    | 5.4** $\pm$ 1.2   | 10.3** $\pm$ 2.3                    |
| [d]                   | 4.9** $\pm$ 1.1    | 5.4** $\pm$ 1.2   | 10.3** $\pm$ 2.3                    |
| [h]                   | 82.0** $\pm$ 6.7   | 66.6** $\pm$ 6.5  | 152.0** $\pm$ 13.1                  |
| $\chi^2$              | 19.4               | 6.14              | 9.9                                 |
| p                     | 0.0002             | 0.10              | 0.02                                |
| scaling tests         |                    |                   |                                     |
| A                     | -10.7 $\pm$ 29.1   | -21.6 $\pm$ 25.0  | -32.3 $\pm$ 52.6                    |
| B                     | -68.2** $\pm$ 15.6 | -34.0 $\pm$ 17.6  | -102.2** $\pm$ 32.9                 |
| C                     | -33.9 $\pm$ 36.9   | -61.2* $\pm$ 29.9 | -95.1 $\pm$ 64.9                    |

<sup>a</sup> Total capsaicinoids considered as the sum of the capsaicin and dihydrocapsaicin contents.

<sup>b</sup> m, midparent; <sup>c</sup> [d], additive; <sup>d</sup> [h], dominance.

\*, \*\* Significantly different from zero at  $p < 0.05$  or 0.01, respectively, based on normal deviates table.

**Table 3.** Joint Scaling Test and Estimates ( $\pm$  SE) with Six-parameter Model using the Means of Six Families for Capsaicin (CAP), Dihydrocapsaicin (DHC), and Total Capsaicinoids of an Intraspecific Cross of *C. annuum* L. across Two Environments

|                  | CAP               | DHC               | total<br>capsaicinoids <sup>a</sup> |
|------------------|-------------------|-------------------|-------------------------------------|
| <b>Spring</b>    |                   |                   |                                     |
| m <sup>b</sup>   | 80.4* $\pm$ 37.9  | 72.1 $\pm$ 36.8   | 156.5* $\pm$ 71.4                   |
| [d] <sup>c</sup> | 4.8* $\pm$ 1.9    | 4.6* $\pm$ 2.0    | 9.5* $\pm$ 3.9                      |
| [h] <sup>d</sup> | -121.1 $\pm$ 89.3 | -96.9 $\pm$ 86.5  | -230.0 $\pm$ 165.2                  |
| [i] <sup>e</sup> | -75.6* $\pm$ 37.7 | -67.5* $\pm$ 36.7 | -146.9* $\pm$ 70.9                  |
| [j] <sup>f</sup> | —                 | —                 | —                                   |
| [l] <sup>g</sup> | 80.7 $\pm$ 54.3   | 55.4 $\pm$ 52.2   | 144.1 $\pm$ 98.8                    |
| $\chi^2$         | 0.15              | 0.46              | 0.10                                |
| p                | 0.70              | 0.50              | 0.75                                |
| <b>Summer</b>    |                   |                   |                                     |
| m                | 4.8** $\pm$ 1.1   | 5.5** $\pm$ 1.2   | 10.4** $\pm$ 2.3                    |
| [d]              | 4.8** $\pm$ 1.1   | 5.5** $\pm$ 1.2   | 10.4** $\pm$ 2.3                    |
| [h]              | 46.8 $\pm$ 24.0   | 23.1 $\pm$ 20.5   | 72.5 $\pm$ 43.5                     |
| [i]              | —                 | —                 | —                                   |
| [j]              | 71.5** $\pm$ 27.0 | 11.1 $\pm$ 26.6   | 80.7 $\pm$ 52.4                     |
| [l]              | 57.6* $\pm$ 28.9  | 58.8* $\pm$ 25.5  | 113.9* $\pm$ 53.2                   |
| $\chi^2$         | 1.05              | 0.02              | 0.26                                |
| p                | 0.31              | 0.88              | 0.61                                |

<sup>a</sup> Total capsaicinoids considered as the sum of the capsaicin and dihydrocapsaicin contents.

<sup>b</sup> m, midparent; <sup>c</sup> [d], additive; <sup>d</sup> [h], dominance; <sup>e</sup> [i], additive x additive; <sup>f</sup> [j], additive x dominance; <sup>g</sup> [l], dominance x dominance.

\*, \*\* Significantly different from zero at  $p < 0.05$  or  $0.01$ , respectively, based on normal deviates table.

**Table 4.** Correlation Coefficients between Capsaicin (CAP), Dihydrocapsaicin (DHC), and Total Capsaicinoid Contents for Pepper Fruits Grown in Spring and Summer from Six Families of an Intraspecific Cross of *C. annuum* L.

|                        | CAP     | DHC     | total<br>capsaicinoids <sup>a</sup> |  |
|------------------------|---------|---------|-------------------------------------|--|
| Spring                 |         |         |                                     |  |
| CAP                    | 1       |         |                                     |  |
| DHC                    | 0.859** | 1       |                                     |  |
| total<br>capsaicinoids | 0.967** | 0.960** | 1                                   |  |
| Summer                 |         |         |                                     |  |
| CAP                    | 1       |         |                                     |  |
| DHC                    | 0.982** | 1       |                                     |  |
| total<br>capsaicinoids | 0.996** | 0.994** | 1                                   |  |
| Combined seasons       |         |         |                                     |  |
| CAP                    | 1       |         |                                     |  |
| DHC                    | 0.892** | 1       |                                     |  |
| total<br>capsaicinoids | 0.977** | 0.967** | 1                                   |  |

<sup>a</sup> Total capsaicinoid considered as the sum of the capsaicin and dihydrocapsaicin contents.

\*, \*\*, \*\*\* Significant at  $p < 0.05$ , 0.01 or 0.001, respectively.
